# Supplementary material for: Functional interplay between E2F7 and ribosomal rRNA gene transcription regulates protein synthesis
Source: PubMed Central journal article supplement (PMC5951837; doi:10.1038/s41419-018-0529-6), 2018-05-14

SI Figure 1

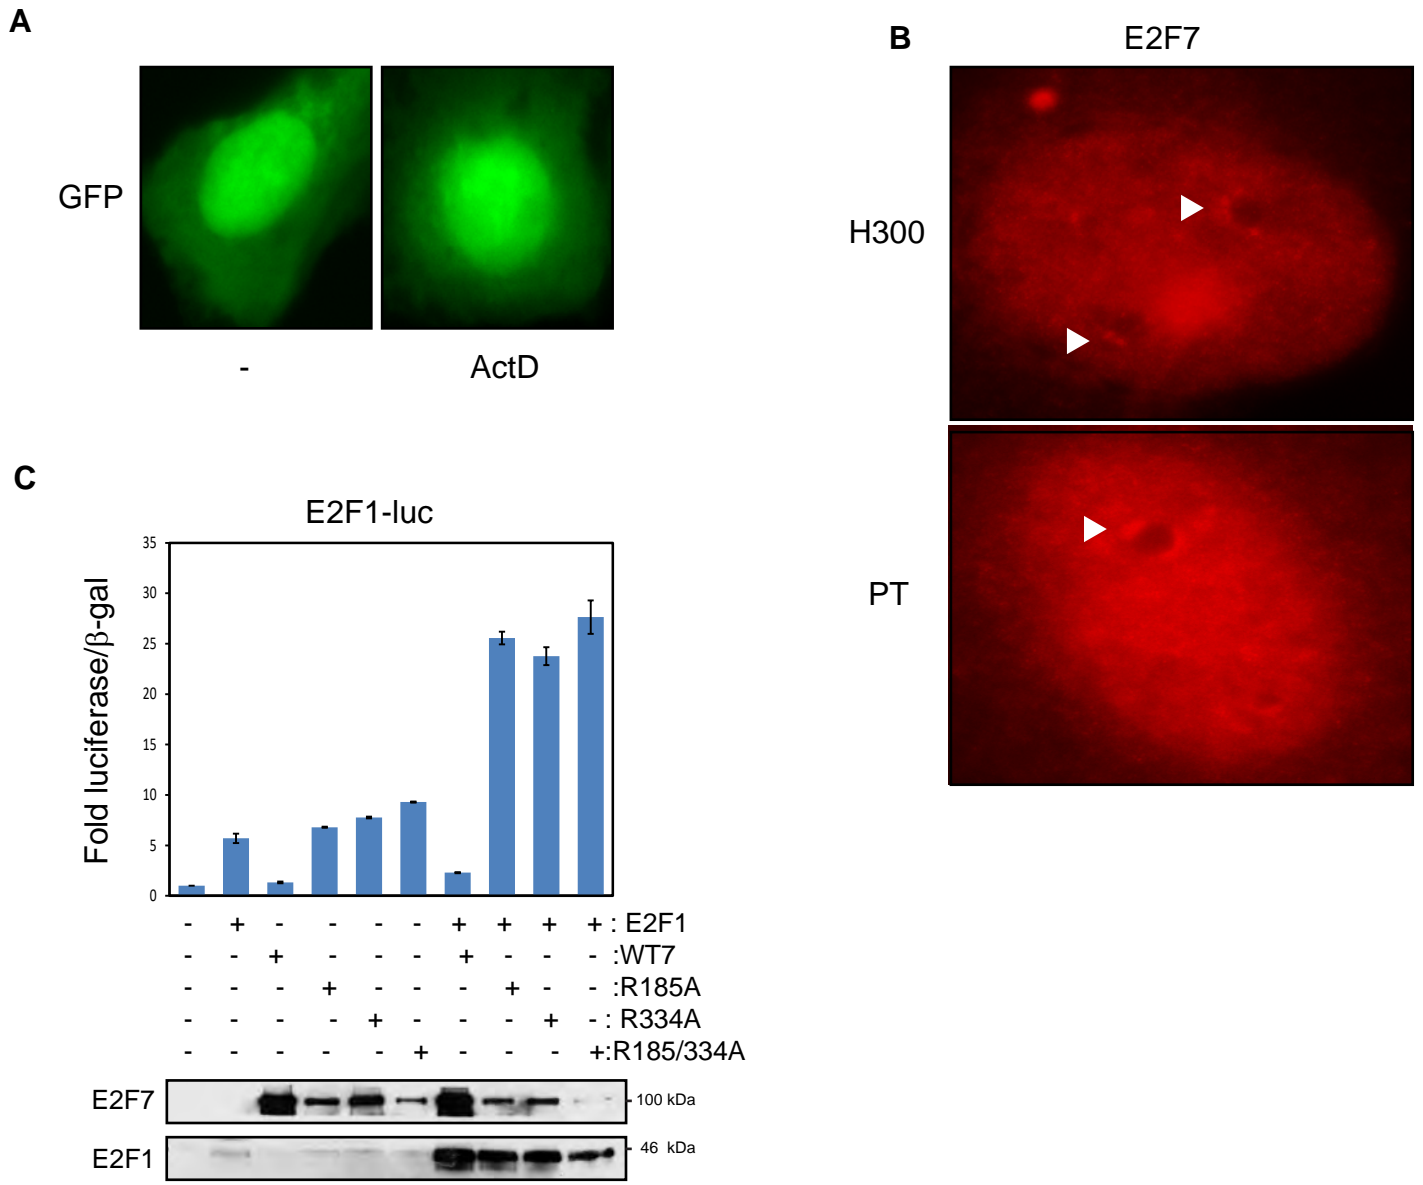

Supplement: 41419_2018_529_MOESM1_ESM.pdf [file 41419_2018_529_MOESM1_ESM.pdf]
